# Supplementary material for: Two‐Wave Variable Nanotheranostic Agents for Dual‐Mode Imaging‐Guided Photo‐Induced Triple‐Therapy for Cancer
Source: PubMed Central journal article supplement (PMC9507363; doi:10.1002/advs.202201834), 2022-08-02
Supplement: ADVS-9-2201834-s001.pdf [file ADVS-9-2201834-s001.pdf]

Supporting Information

**Two-wave Variable Nanotheranostic Agents for Dual-mode Imaging-guided Photo-induced Triple-therapy for Cancer**

*Xiao Sang*‡, *Tong Gao*‡, *Xiaoqing Liu*, *Yelong Shen*, *Lili Chang*, *Shunli Fu*, *Han Yang*, *Huizhen Yang*, *Weiwei Mu*, *Shuang Liang*, *Zipeng Zhang*, *Na Zhang*\*, and *Yongjun Liu*\*

‡These authors contributed equally

\*Corresponding Author

X. Sang, T. Gao, X. Liu, L. Chang, S. Fu, H. Yang, H. Z. Yang, W. Mu, S. Liang, Z. Zhang, Prof. N. Zhang, A. Prof. Y. Liu

Department of Pharmaceutics, Key Laboratory of Chemical Biology (Ministry of Education), NMPA Key Laboratory for Technology Research and Evaluation of Drug Products, School of Pharmaceutical Sciences, Cheeloo College of Medicine, Shandong University

44 Wenhua Xi Road, Jinan, Shandong Province 250012, China

*E-mail: zhangnancy9@sdu.edu.cn; liuyongjun@sdu.edu.cn*

Y. Shen

Department of Radiology, Shandong Provincial Hospital Affiliated to Shandong First Medical University

324 Jingwu Weiqi Road, Jinan, Shandong Province, 250021, China

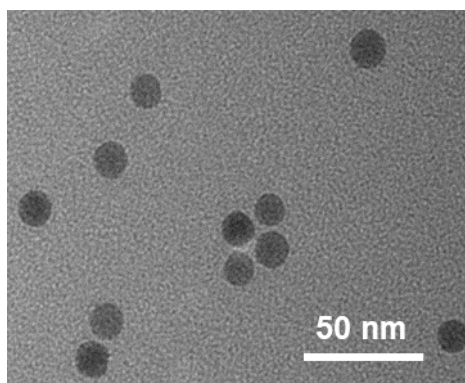

**Figure S1.** TEM image of SPIONs.

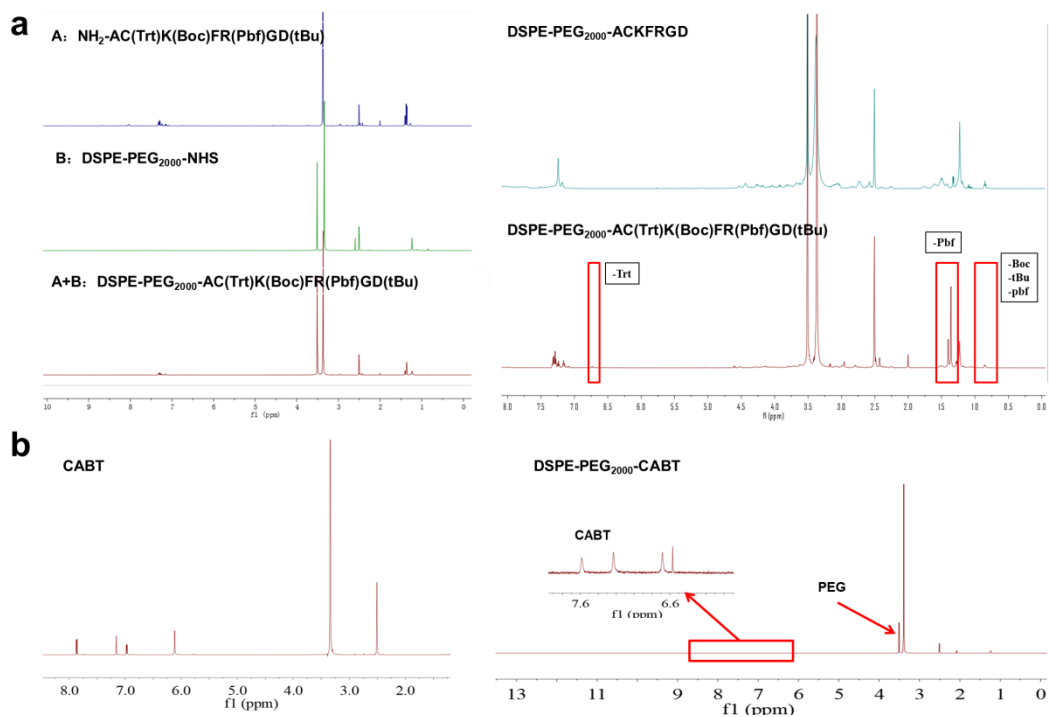

**Figure S2.**  $^1\text{H-NMR}$  spectra of a)  $\text{DSPE-PEG}_{2000}\text{-ACKFRGD}$  and b)  $\text{DSPE-PEG}_{2000}\text{-CABT}$ .

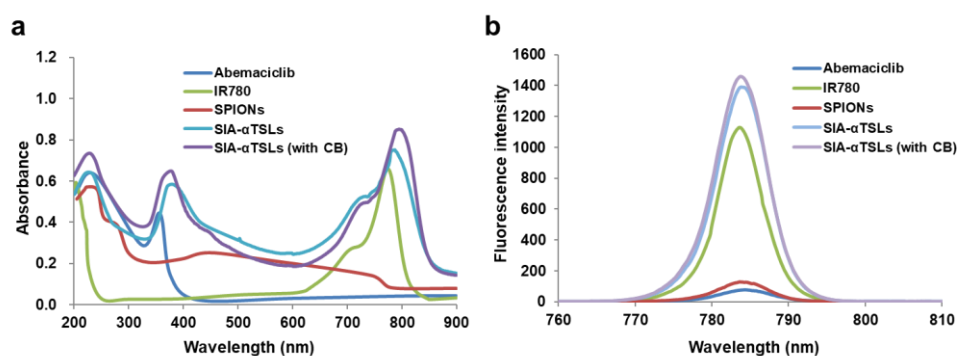

**Figure S3** a) UV-Vis absorption spectra and b) fluorescence spectra of Abemaciclib, IR780, SPIONs, SIA- $\alpha$ TSLs and SIA- $\alpha$ TSL with cathepsin B.

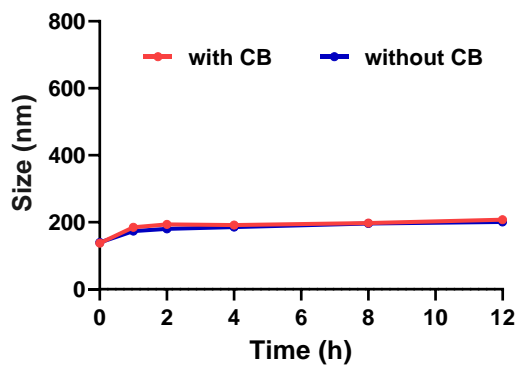

**Figure S4.** The size changes of SIA-TSLs incubated with or without cathepsin B.

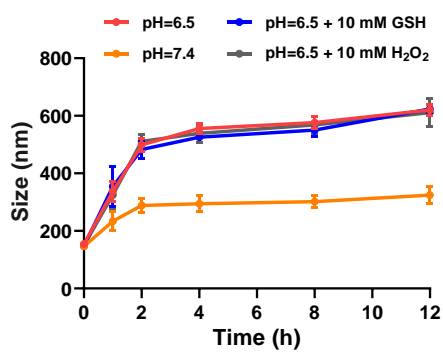

**Figure S5.** The size changes of SIA- $\alpha$ TSLs incubated with cathepsin B at different conditions.

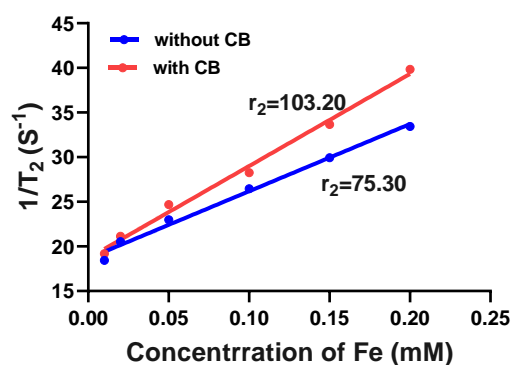

**Figure S6.** The transverse relaxation rate ( $r_2$ ) of SIA-TSLs incubated with or without cathepsin B.

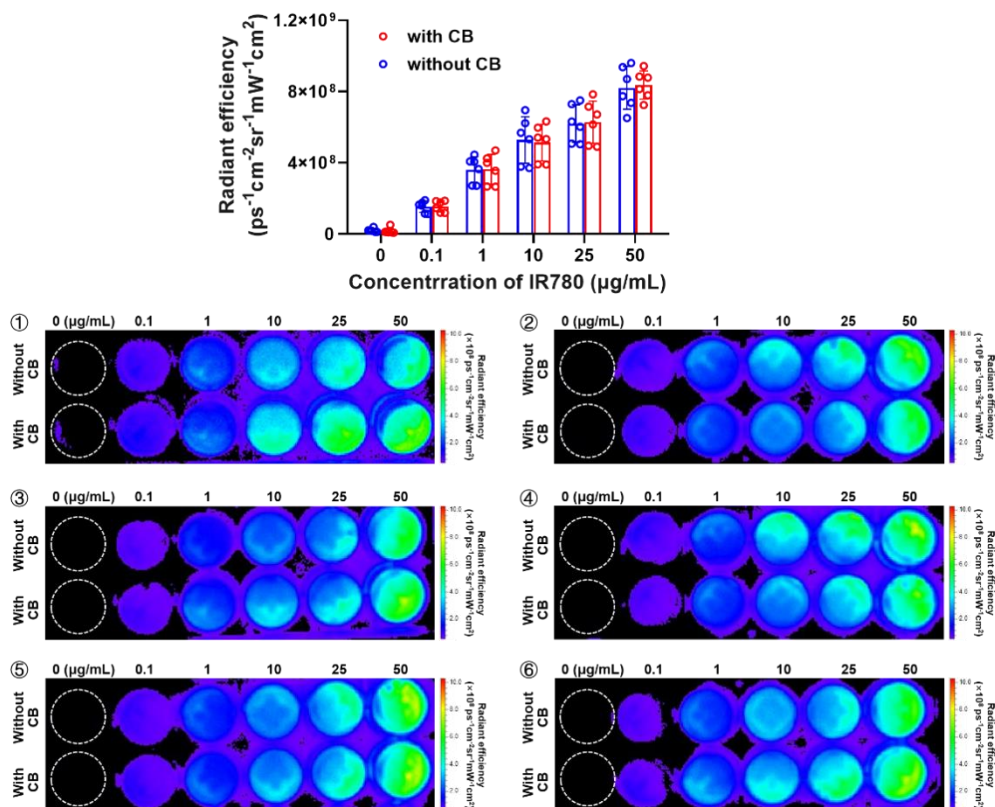

**Figure S7.** NIRFI fluorescence image and intensity quantification of SIA- $\alpha$ TSLs incubated with or without cathepsin B.

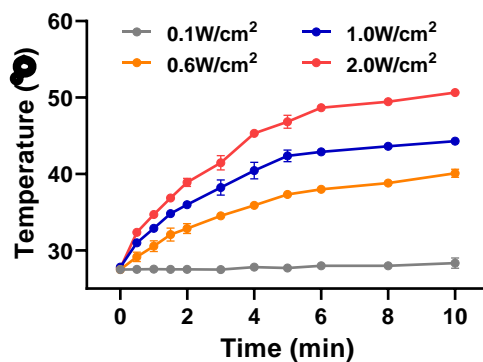

**Figure S8.** Temperature profile of SIA- $\alpha$ TSLs under laser irradiation at different powers.

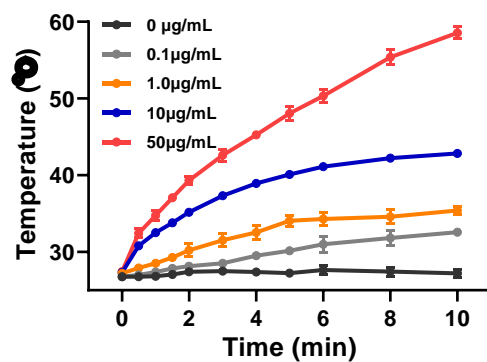

**Figure S9.** Temperature profile of SIA- $\alpha$ TSLs with different concentration under laser irradiation (808 nm) at 1.0 W/cm<sup>2</sup>.

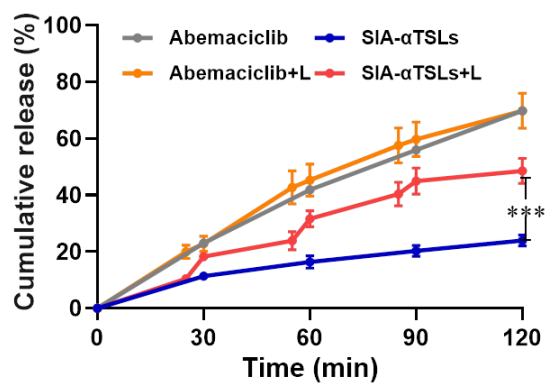

**Figure S10.** Release profiles of Abemaciclib from SIA- $\alpha$ TSLs within 2 h with or without laser irradiation. \*\*\* $p < 0.001$ .

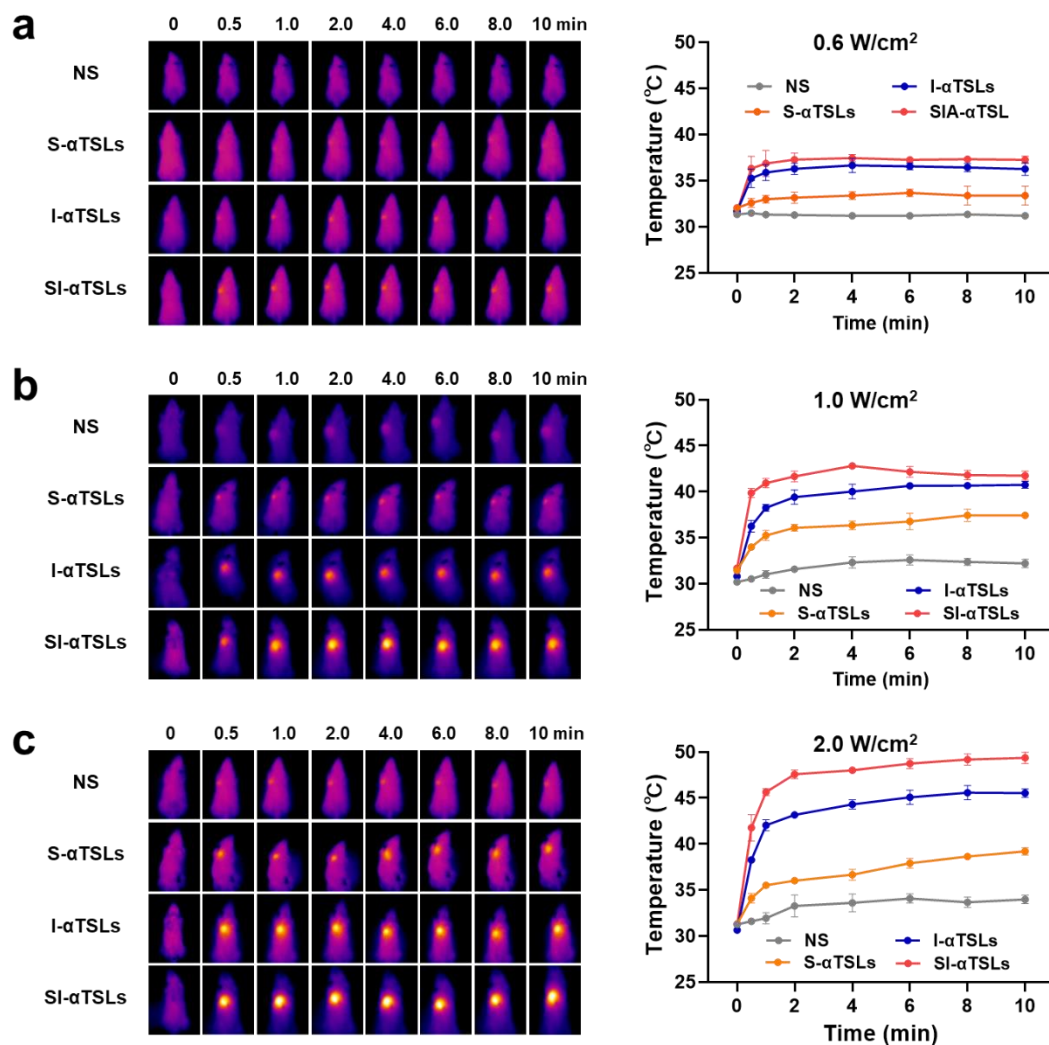

**Figure S11.** Infrared thermal images and temperature profile of tumors within 10 min under a) 0.6 W/cm<sup>2</sup> laser irradiation, b) 1.0 W/cm<sup>2</sup> laser irradiation and c) 2.0 W/cm<sup>2</sup> laser irradiation.

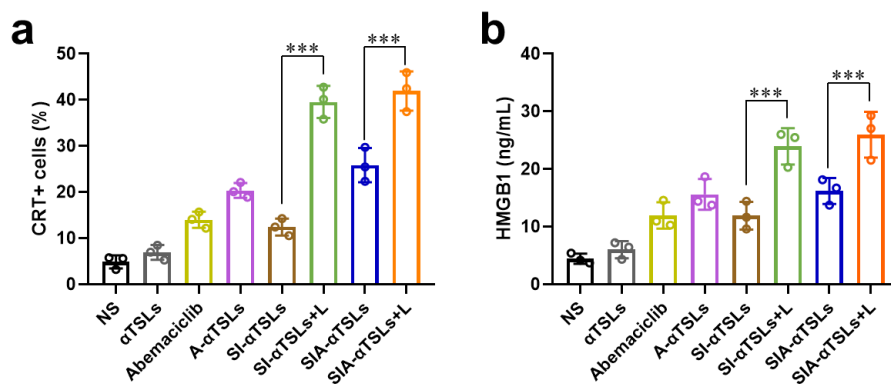

**Figure S12.** a) Flow cytometric analysis of CRT exposure on CT26 cells. b) ELISA analysis of HMGB1 released from CT26 cells. \*\*\* $p < 0.001$ .

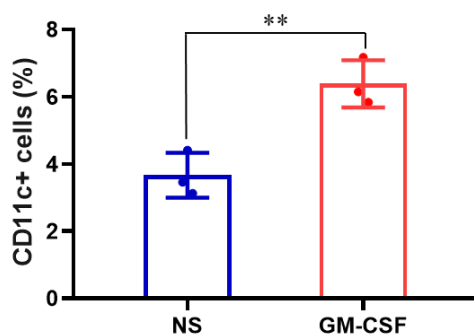

**Figure S13.** Flow cytometry analysis of CD11c<sup>+</sup> cells in tumor tissue after intratumoral injection of NS or GM-CSF. \*\**p* < 0.01.

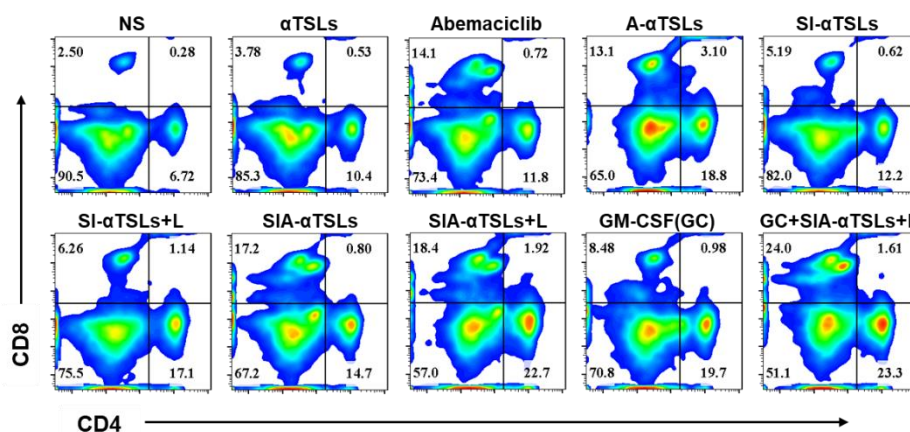

**Figure S14.** Flow cytometry analysis of CD4<sup>+</sup> and CD8<sup>+</sup> T cells in tumor tissue (gated on CD3<sup>+</sup> T cells).

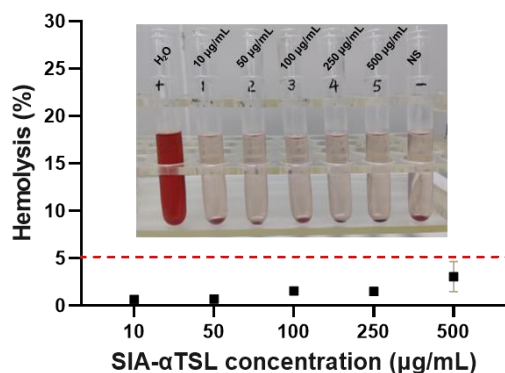

**Figure S15.** Hemolysis percentage of RBCs and the images after RBCs suspension was incubated with SIA-αTSL.



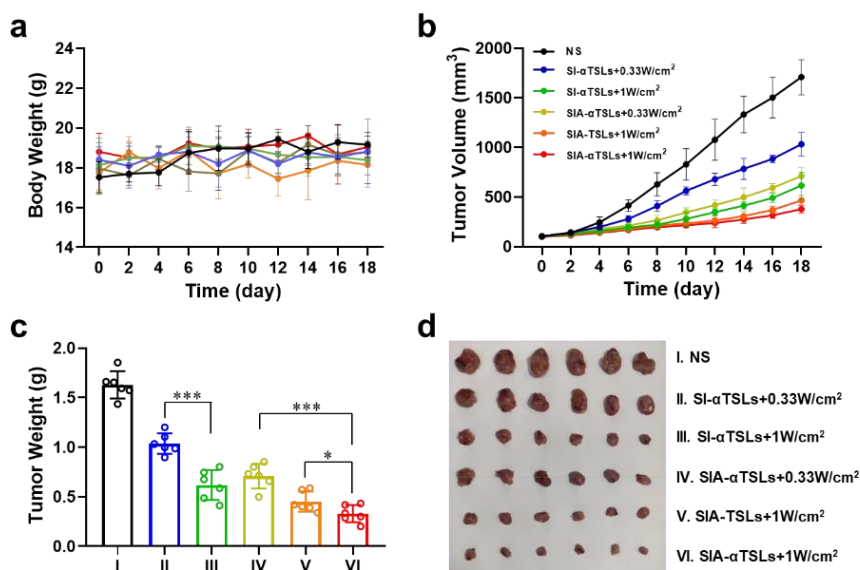

**Figure S16.** a) Body weight b) average tumor growth curves of mice after intravenous injection with different formulations. c) Tumor weight and d) tumor photos at the endpoint. “S” represents SPIONs, “I” represents IR780, “A” represents Abemaciclib, “α” represents that the TSLs can aggregate. Data were shown as mean ± SD (n = 6). \**p* < 0.05 and \*\*\**p* < 0.001.

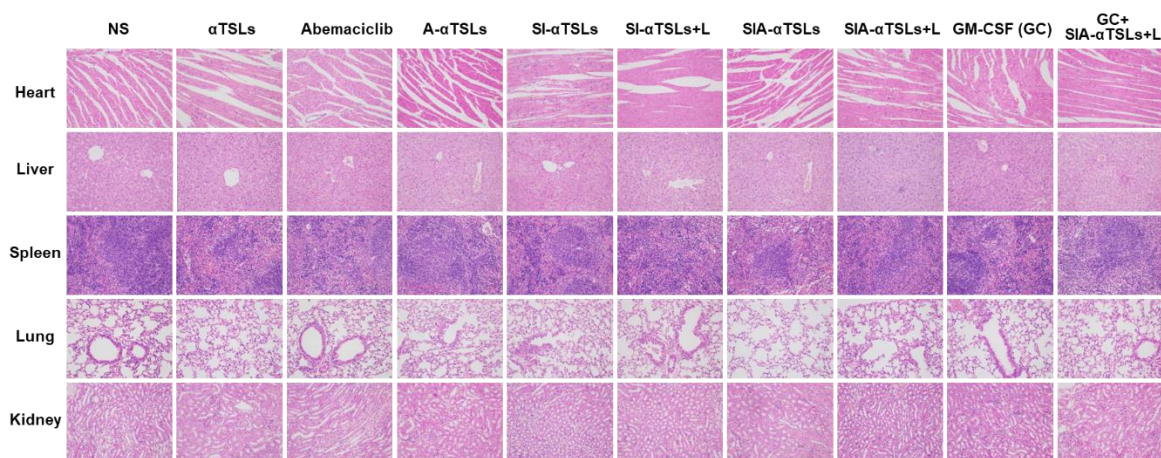

**Figure S17.** Immunohistochemical analysis. Representative microscopy images of H&E-stained histological sections of CT26 tumor-bearing mice after treated with different formulations. Magnification: 200 ×.

**Table S1.** Characterization of TSLs, SIA-TSLs, SIA-A-TSLs and SIA-αTSLs. Data were shown as mean ± SD (n=3).

| Groups     | Size (nm)     | PDI           | Zeta (mV)    |
|------------|---------------|---------------|--------------|
| TSLs       | 101.80 ± 3.44 | 0.105 ± 0.015 | -1.30 ± 0.26 |
| SIA-TSLs   | 139.57 ± 4.27 | 0.145 ± 0.049 | -6.16 ± 0.54 |
| SIA-A-TSLs | 146.30 ± 3.80 | 0.168 ± 0.051 | -6.85 ± 0.90 |



|                    |                   |                   |                  |
|--------------------|-------------------|-------------------|------------------|
| SIA- $\alpha$ TSLs | 148.13 $\pm$ 4.24 | 0.120 $\pm$ 0.052 | -4.69 $\pm$ 0.17 |
|--------------------|-------------------|-------------------|------------------|

**Table S2.** Drug loading efficiency and encapsulation efficiency of Abemaciclib, IR780 and SPIONs in SIA- $\alpha$ TSLs. Data were shown as mean  $\pm$  SD (n=3).

| Drugs       | Drug loading (%) | Encapsulation efficiency (%) |
|-------------|------------------|------------------------------|
| Abemaciclib | 9.87 $\pm$ 0.22  | 95.34 $\pm$ 2.19             |
| IR780       | 0.90 $\pm$ 0.04  | 88.50 $\pm$ 0.92             |
| SPIONs      | 0.80 $\pm$ 0.05  | 40.12 $\pm$ 2.77             |

**Table S3.** The IC<sub>50</sub> values of Abemaciclib, A- $\alpha$ TSLs, SIA- $\alpha$ TSLs and SIA- $\alpha$ TSLs+L in CT26 cells. Data were shown as mean  $\pm$  SD (n=3). \*\**p* < 0.01, compare with SIA- $\alpha$ TSLs group.

| Groups               | IC <sub>50</sub> ( $\mu$ g/mL) |
|----------------------|--------------------------------|
| Abemaciclib          | 2.71 $\pm$ 0.70                |
| A- $\alpha$ TSLs     | 2.10 $\pm$ 0.52                |
| SIA- $\alpha$ TSLs   | 1.81 $\pm$ 0.12                |
| SIA- $\alpha$ TSLs+L | 0.18 $\pm$ 0.10 **             |

**Table S4.** Tumor inhibition rate of tumor-bearing mice after intravenous injection with different groups. Data were shown as mean  $\pm$  SD (n=6).

| Groups                  | Tumor inhibition rate (%) |
|-------------------------|---------------------------|
| $\alpha$ TSLs           | 7.04 $\pm$ 11.88          |
| Abemaciclib             | 50.87 $\pm$ 7.33          |
| A- $\alpha$ TSLs        | 57.35 $\pm$ 5.57          |
| SI- $\alpha$ TSLs       | 14.88 $\pm$ 12.90         |
| SI- $\alpha$ TSLs+L     | 67.55 $\pm$ 5.46          |
| SIA- $\alpha$ TSLs      | 59.27 $\pm$ 6.18          |
| SIA- $\alpha$ TSLs+L    | 79.71 $\pm$ 3.27          |
| GM-CSF(GC)              | 34.25 $\pm$ 9.39          |
| GC+SIA- $\alpha$ TSLs+L | 92.88 $\pm$ 0.84          |
